# Supplementary material
Source: PubMed Central journal article supplement (PMC7754791)
Supplement: NIHMS1624568-supplement-Supplemental_Figures.pdf [file NIHMS1624568-supplement-Supplemental_Figures.pdf]

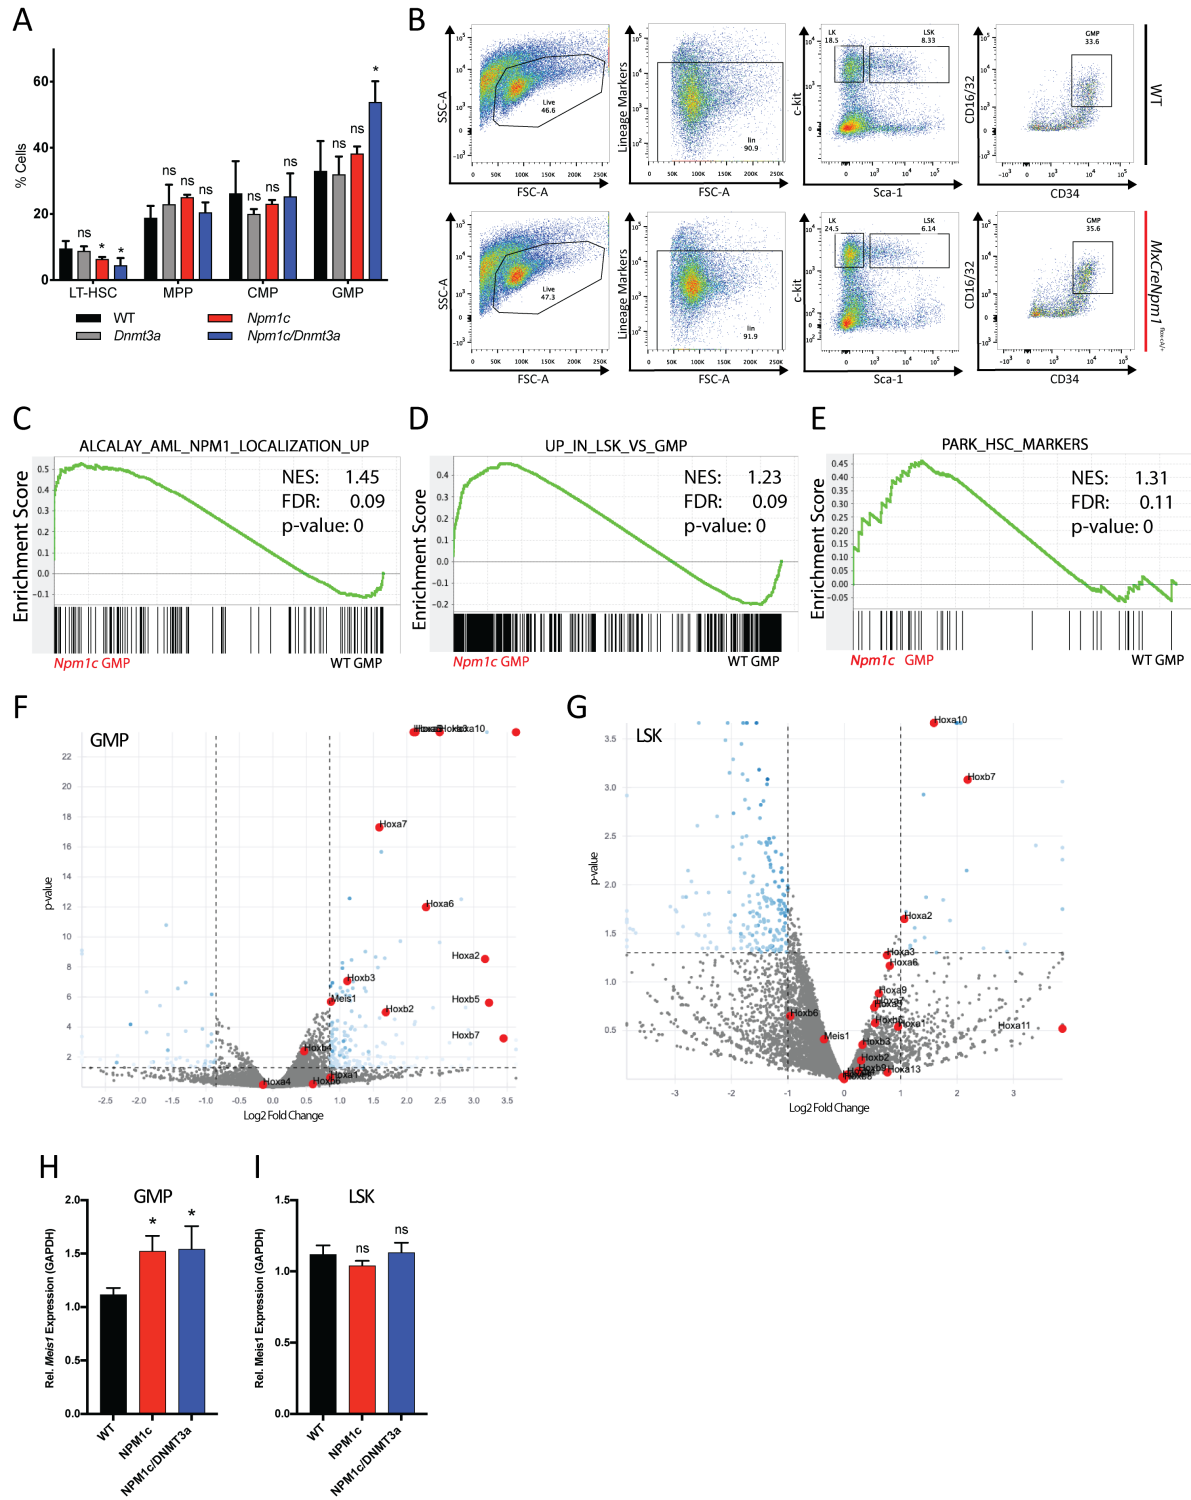

**Fig. S1. *Npm1c* is sufficient to induce stem cell gene expression program in myeloid progenitor cells.**

(A) FACS analysis of LT-HSC, MPP, CMP and GMP percentages in WT, *MxCreDnmt3a*<sup>R878H/+</sup>, *MxCreNpm1*<sup>flox-CA/+</sup> single, and *MxCreNpm1*<sup>flox-CA/+</sup>*Dnmt3a*<sup>R878H/+</sup> double mutant mice 16 weeks

after pIpC induction of knock-in. (Error bars, mean  $\pm$  SEM. Two-way ANOVA. \* P <0.05) (B) Representative FACS gating scheme showing LSK and GMP populations in WT and *MxCreNpm1<sup>flox-cA/+</sup>* mice 16 weeks after pIpC injection. (C) Gene set enrichment analysis comparing genes induced by *Npm1c* in mouse GMPs (4 weeks post pIpC induction) to human *NPM1c* AML, (D) mouse stem cell signatures and (E) HSC markers (Table S3). (F) Scatter plot of Log2 fold changes in gene expression in *Npm1c* versus WT GMPs and (G) LSK cells, 4 weeks post pIpC treatment (n=3 mice per group). (H) qRT-PCR validation of changes in gene expression in WT, *MxCreNpm1<sup>flox-cA/+</sup>* single, and *MxCreNpm1<sup>flox-cA/+</sup>Dnmt3a<sup>R878H/+</sup>* double mutant GMPs and (I) LSK cells, 4 weeks post pIpC treatment (n=3 mice per group).

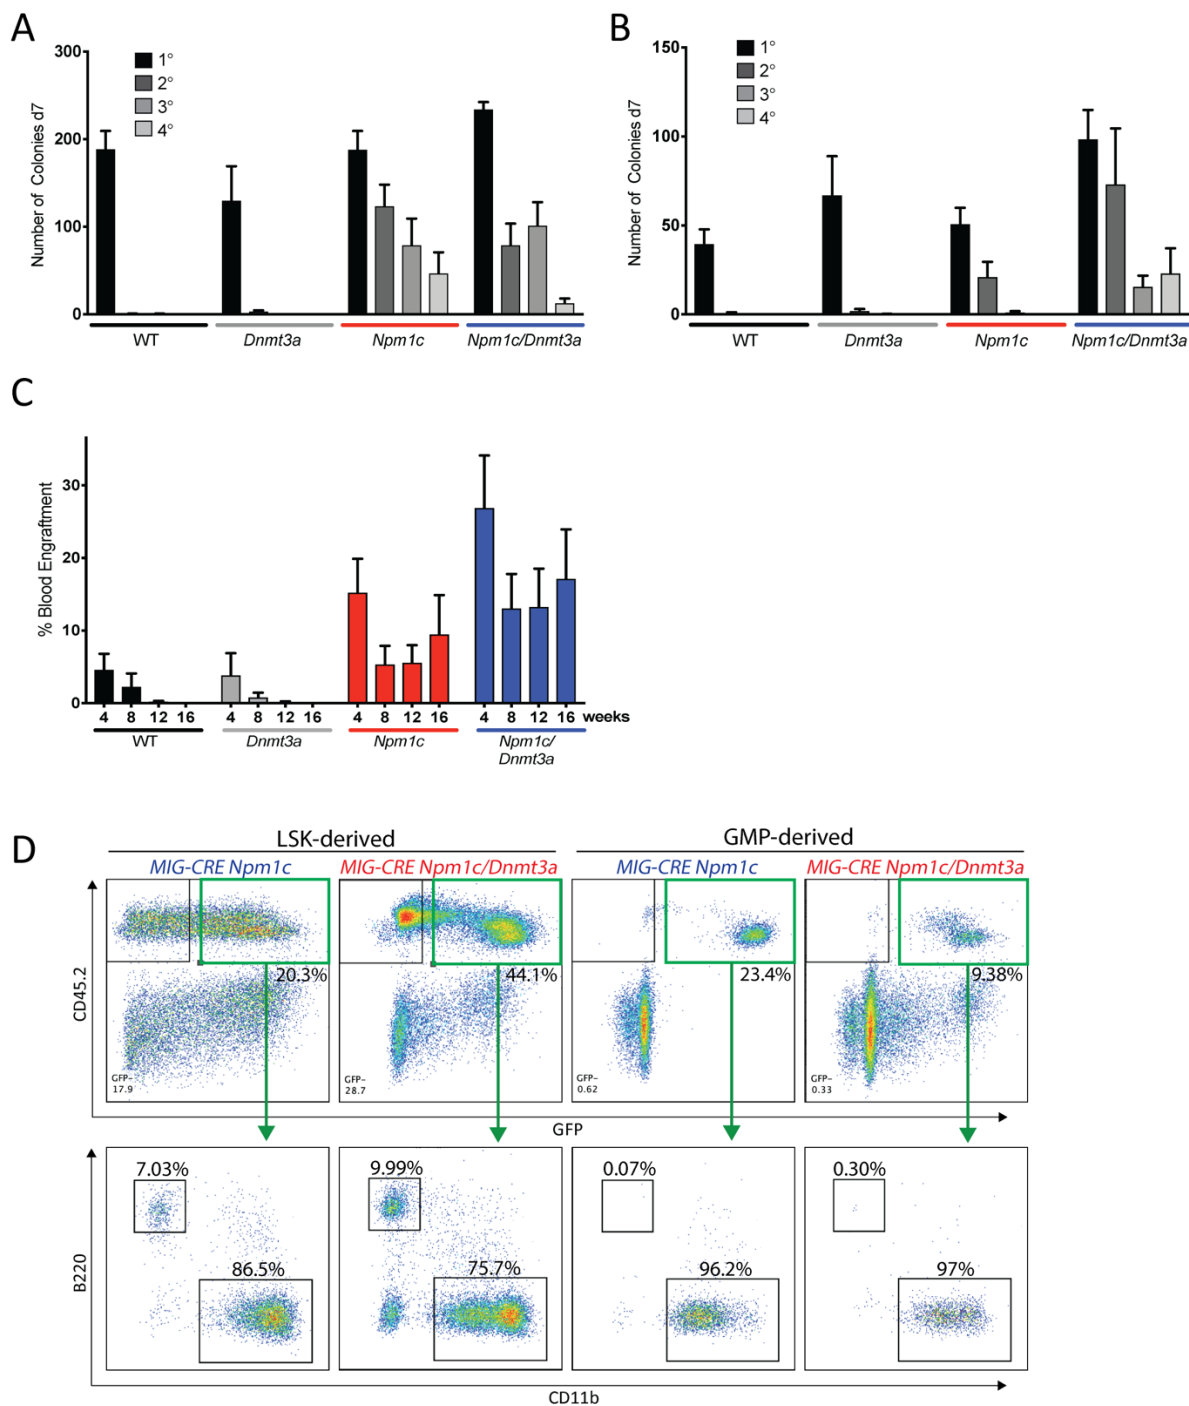

**Fig. S2. *Npm1c* is sufficient to induce self-renewal properties in myeloid progenitor cells *in vitro* and *in vivo*.**

(A) Colony forming assay of WT, *MxCreNpm1<sup>fllox-cA/+</sup>* single, and *MxCreNpm1<sup>fllox-cA/+</sup>Dnmt3a<sup>R878H/+</sup>* double mutant GMPs sorted 4 weeks post pIpC induction of *Cre* excision *in vivo* (n≥6). (B) CFU replating assay using FACS sorted WT, *Dnmt3a<sup>R878H/+</sup>*, *Npm1c<sup>fllox-cA/+</sup>*, and double mutant GMPs infected with retroviral *MIG-Cre* *in vitro* (n≥8 mice per group, error bars, mean ± SEM). (C) Summary of peripheral blood (%CD45.2) engraftment of *in vitro* *MIG-Cre* infected

WT and mutant GMPs, transplanted into lethally irradiated recipients (CD45.1). (D) Representative FACS plots of peripheral blood (CD45.2<sup>+</sup> and GFP<sup>+</sup>) engraftment of *in vitro* MIG-Cre infected *Npm1<sup>flox-cA/+</sup>Dnmt3a<sup>R878H/+</sup>* GMPs or LSK 7 months post-transplant analyzed for their expression of lymphoid (B220) and myeloid (CD11b) surface markers.



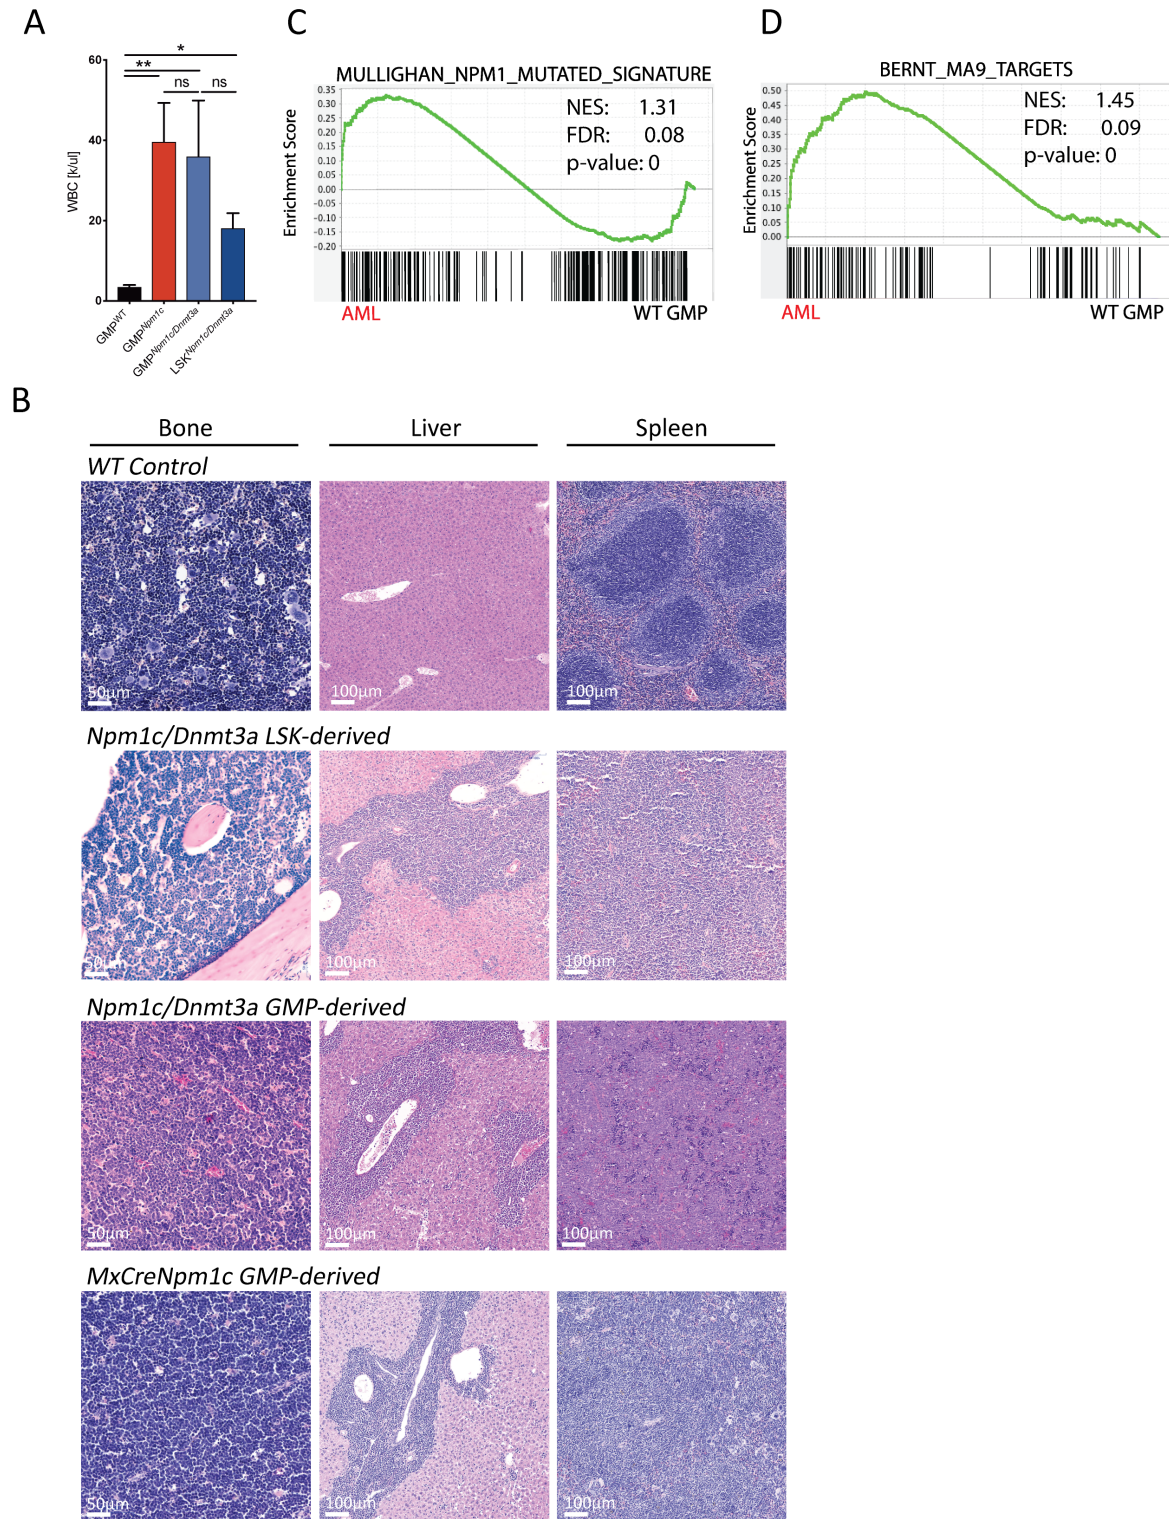

**Fig. S3. Mouse *Npm1c*<sup>+</sup> AMLs can be derived from granulocyte and macrophage progenitors.**

(A) Comparison of WBC counts of *MIG-CreNpm1*<sup>*flox-cA/+*</sup>*Dnmt3a*<sup>*R878H/+*</sup> LT-GMP or LSK-derived and *MxCreNpm1c*<sup>*flox-cA/+*</sup> LT-GMP-derived leukemia bearing mice to WT control mice (n≥4 mice

per group). (B) Histological analysis of bone, spleen and liver sections of moribund mutant mice compared to WT control. (C) Gene set enrichment analysis comparing sorted mouse *MIG-CreNpm1<sup>lox-cA/+</sup>Dnmt3a<sup>R878H/+</sup>* mutant AML cells to human *NPM1c<sup>+</sup>* AML and (D) *MLL-AF9* AML gene signatures (Table S3). \*\* P <0.01, \*\*\* P <0.001.

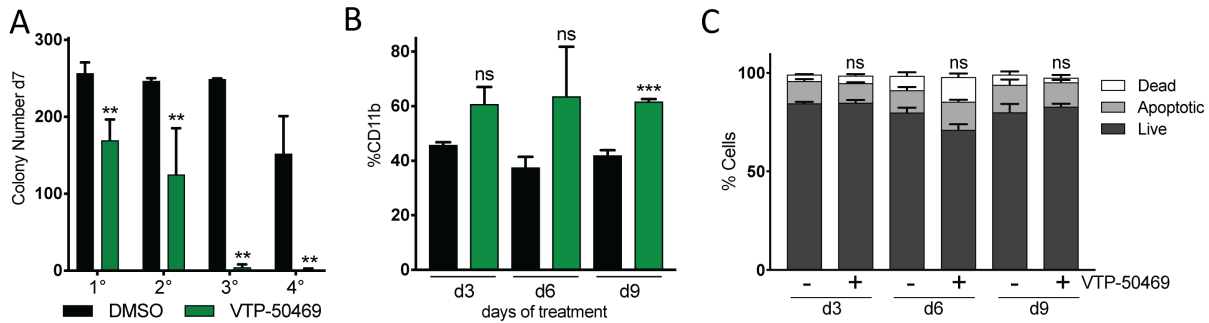

**Fig. S4. *Npm1<sup>flox-cA/+</sup>* cell lines respond to VTP-50469 treatment by loss of self-renewal, upregulation of myeloid differentiation markers, and no increase in apoptosis.**

(A) Colony forming assay of mouse *Npm1<sup>flox-cA/+</sup>* cell line serially replated every seven days in the presence of DMSO or 10 nM VTP-50469. Mean of three independent experiments. (B) FACS analysis of %CD11b expression and (C) Annexin V staining of mouse *Npm1<sup>flox-cA/+</sup>*Dnmt3a*<sup>R878H/+</sup>* cell line (SIIL12) treated with 10 nM VTP-50496 for 3, 6, and 9 days. Mean  $\pm$  SEM. One-way ANOVA. \*\* P < 0.01, \*\*\* P < 0.001.

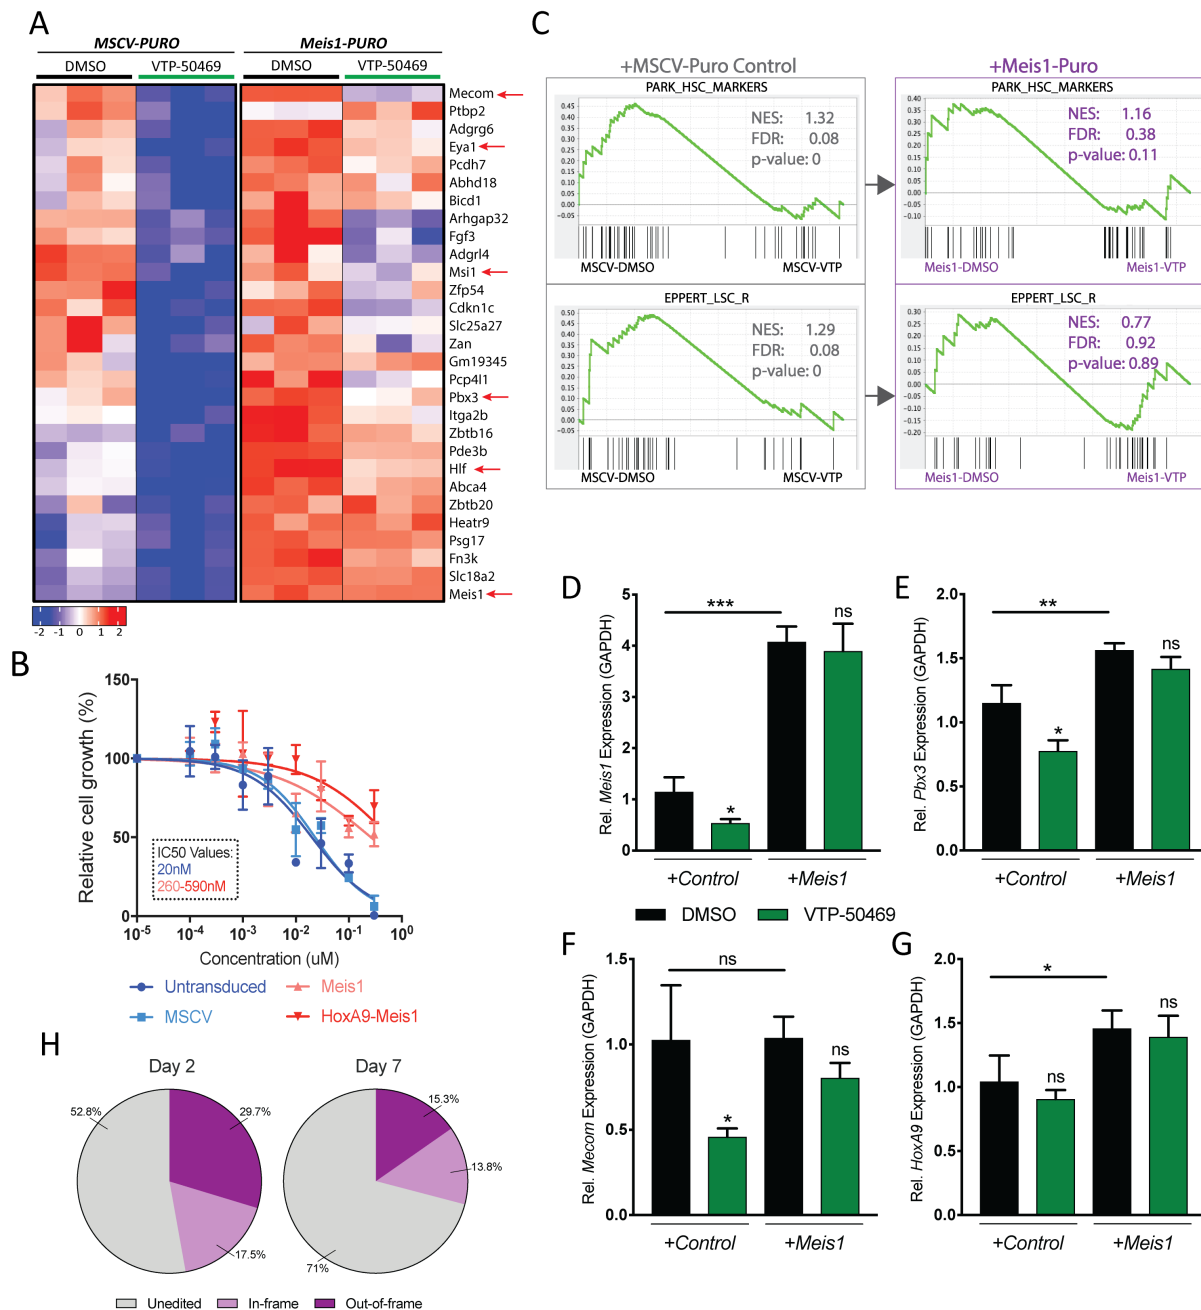

**Fig. S5. *Meis1*-overexpression rescues parts of the leukemic stem cell program repressed by VTP-50469.**

(A) Heatmap of genes repressed by VTP-50469 in MSCV-puro but rescued in *Meis1*-puro expressing mouse *NPM1<sup>fllox-cA/+</sup>Dnmt3a<sup>R878H/+</sup>* SIIL12 cells. Red arrows indicate important stem cell genes (n=3). (B) VTP-50469 dose response curve of mouse *Npm1<sup>fllox-cA/+</sup>Dnmt3a<sup>R878H/+</sup>* cell line (SIIL12) expressing *MSCV-IRES-puro* control (MSCV), *Meis1-IRES-puro* (*Meis1*), or *Meis1/HoxA9-IRES-hygro* (*HoxA9-Meis1*). Representative of three independent experiments. (C) GSEA analysis assessing normal and leukemic stem cells signatures that are significantly repressed in *MSCV* control (left panel) but not in *Meis1* overexpressing (right panel) SIIL12 cells

in response to 30 nM VTP-50469 treatment (day 3). (D) RT-PCR validation of *Meis1*, (E) *Pbx3*, (F) *Mecom*, (G) *HoxA9* expression in control (*MSCV-IRES-puro*) SIIL12 versus *Meis1* overexpressing cells treated with 30 nM VTP-50469 (day 3). (H) Pie chart of percentage of CRISPR edits at the *Meis1* locus that are in frame, out-of-frame, or unedited on day 1 and day 7 post electroporation with *sgMeis1* in SIIL12 cells. One-way ANOVA. \* P <0.05, \*\* P 0.01, \*\*\* P <0.001.

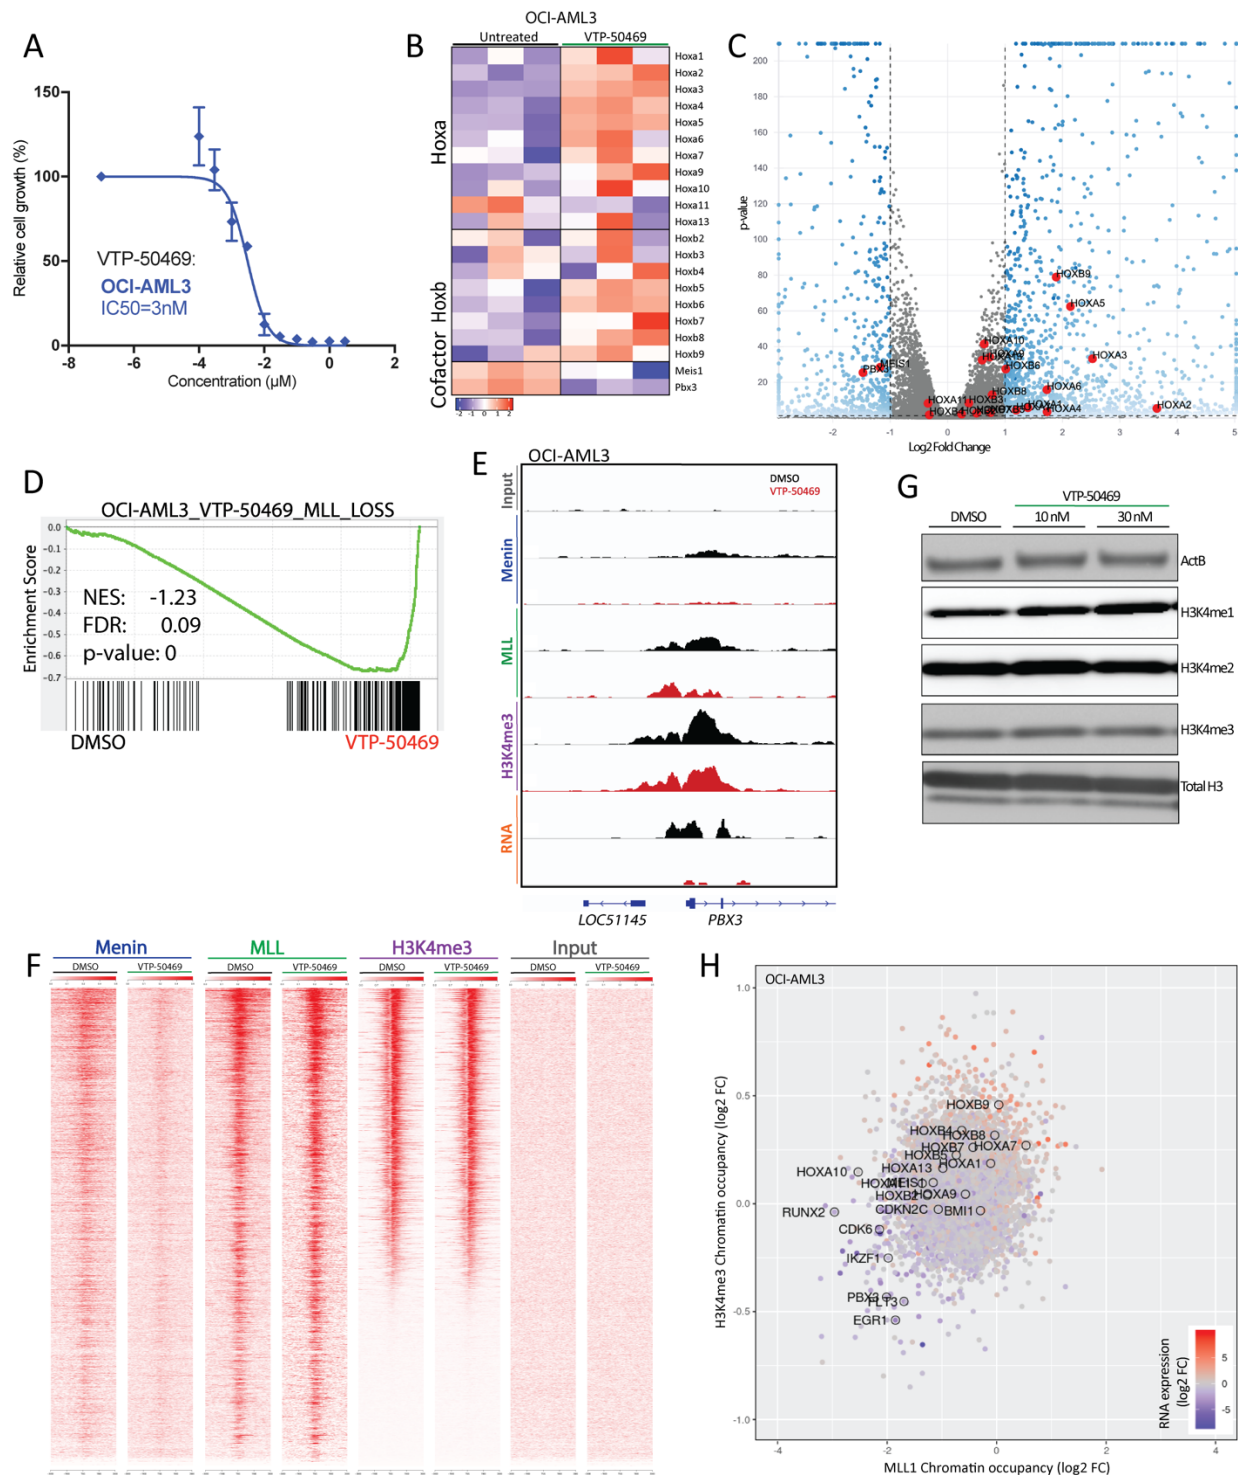

**Fig. S6. Human cell line OCI-AML3 is sensitive to VTP-50469 treatment and shows repression of *MEIS1* and *PBX3* but not *HOXA/B* cluster genes.**

(A) VTP-50469 dose response curve showing cell viability of OCI-AML3 cells and IC50 value on day 6. (B) Heatmap of *HOXA/B* cluster genes and co-factors *MEIS1* and *PBX3* (z-scores of



normalized counts) and (C) Scatterplot of RNAseq gene expression changes in OCI-AML3 cells (n=3, day 5, 330 nM VTP-50469). (D) GSEA analysis assessing loss of gene expression with top 200 genes that lose MLL in response to VTP-50469 treatment in OCI-AML3 cells. (E) ChIPseq density plots showing changes in chromatin occupancy of Menin and MLL as well as changes in mRNA expression in response to VTP-50469 treatment in OCI-AML3 cells at the TSS of *PBX3* (330 nM VTP-50469, ChIPseq day 4, RNAseq day 5). (F) Menin and MLL1 ChIP-seq data in OCI-AML3 shown as tornado plots of approximately 28,482 TSS $\pm$ 3kb showing global decrease in Menin but not MLL1 chromatin occupancy. (G) OCI-AML3 cells were treated with 10 nM or 30 nM VTP-50469 for 4 days and immunoblotted for b-Actin, H3K4me1/2/3 and total histone H3. (H) Scatter plot of Log2 fold changes in chromatin occupancy of MLL1 and H3K4me3 in OCI-AML3 cells treated with VTP-50469 for 4 days.

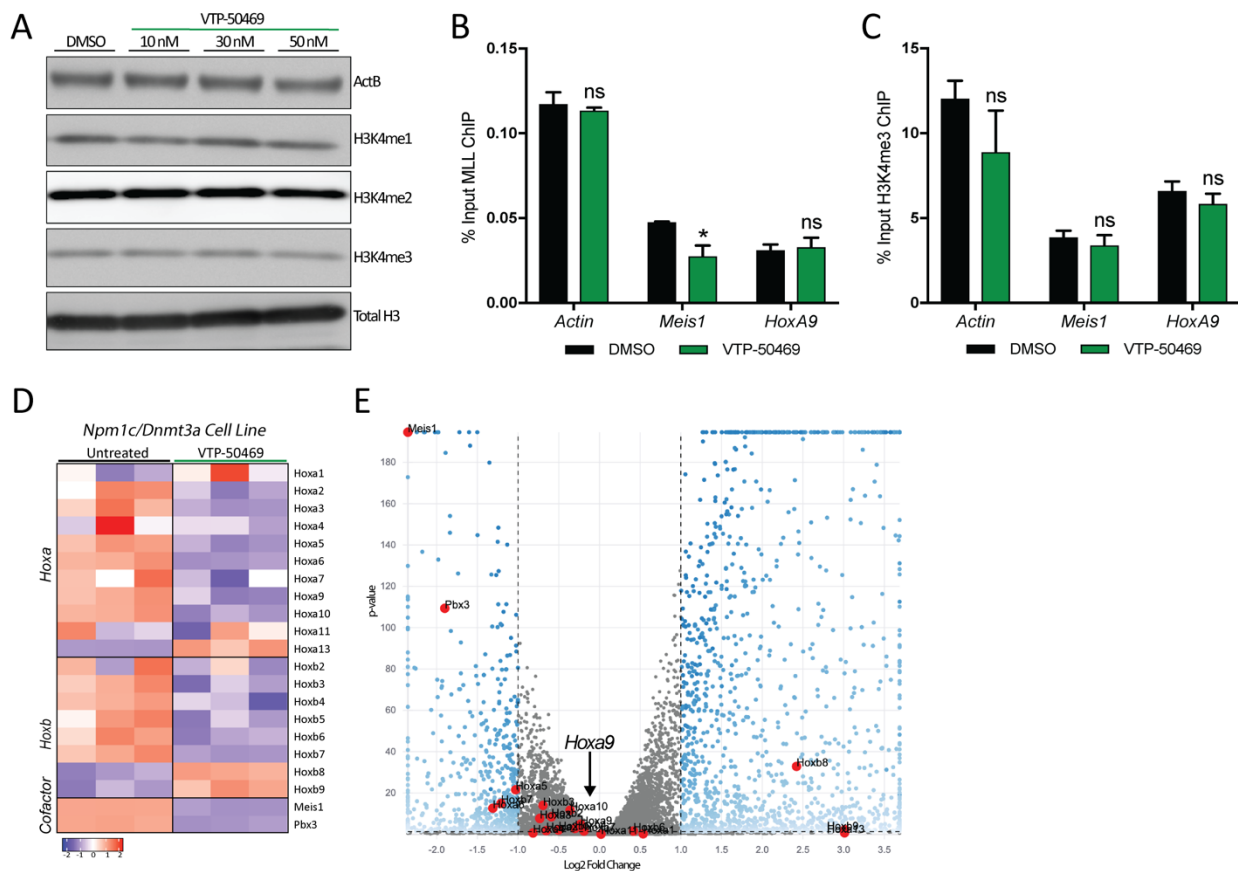

**Fig. S7. Mouse *Npm1c/Dnmt3a* mouse cell line SIIL12 shows reduced MLL1 binding at *Meis1* locus upon VTP-50469 treatment.**

(A) Mouse SIIL12 cells were treated with 10, 30 or 50 nM VTP-50469 for 4 days and immunoblotted for b-Actin, H3K4me1/2/3 and total histone H3. (B) MLL1 chromatin occupancy determined by ChIP-qPCR analysis of mouse SIIL12 cells treated with 100 nM VTP-5046 for 4 days. (C) H3K4me3 histone mark quantified by ChIP-qPCR analysis of mouse SIIL12 cells treated with VTP-5046 for 4 days. One-way ANOVA. \*  $P < 0.05$ . (D) Summary of RNAseq gene expression analysis (z-scores of normalized counts) of *Hoxa/b* cluster and co-factors *Meis1* and *Pbx3* in mouse *Npm1c/Dnmt3a* mutant SIIL12 cells treated with 100 nM VTP-5046 for 4 days. (E) Scatter plot of Log2 fold changes in gene expression in SIIL12 cells treated with 100 nM VTP-5046 for 4 days (n=3).



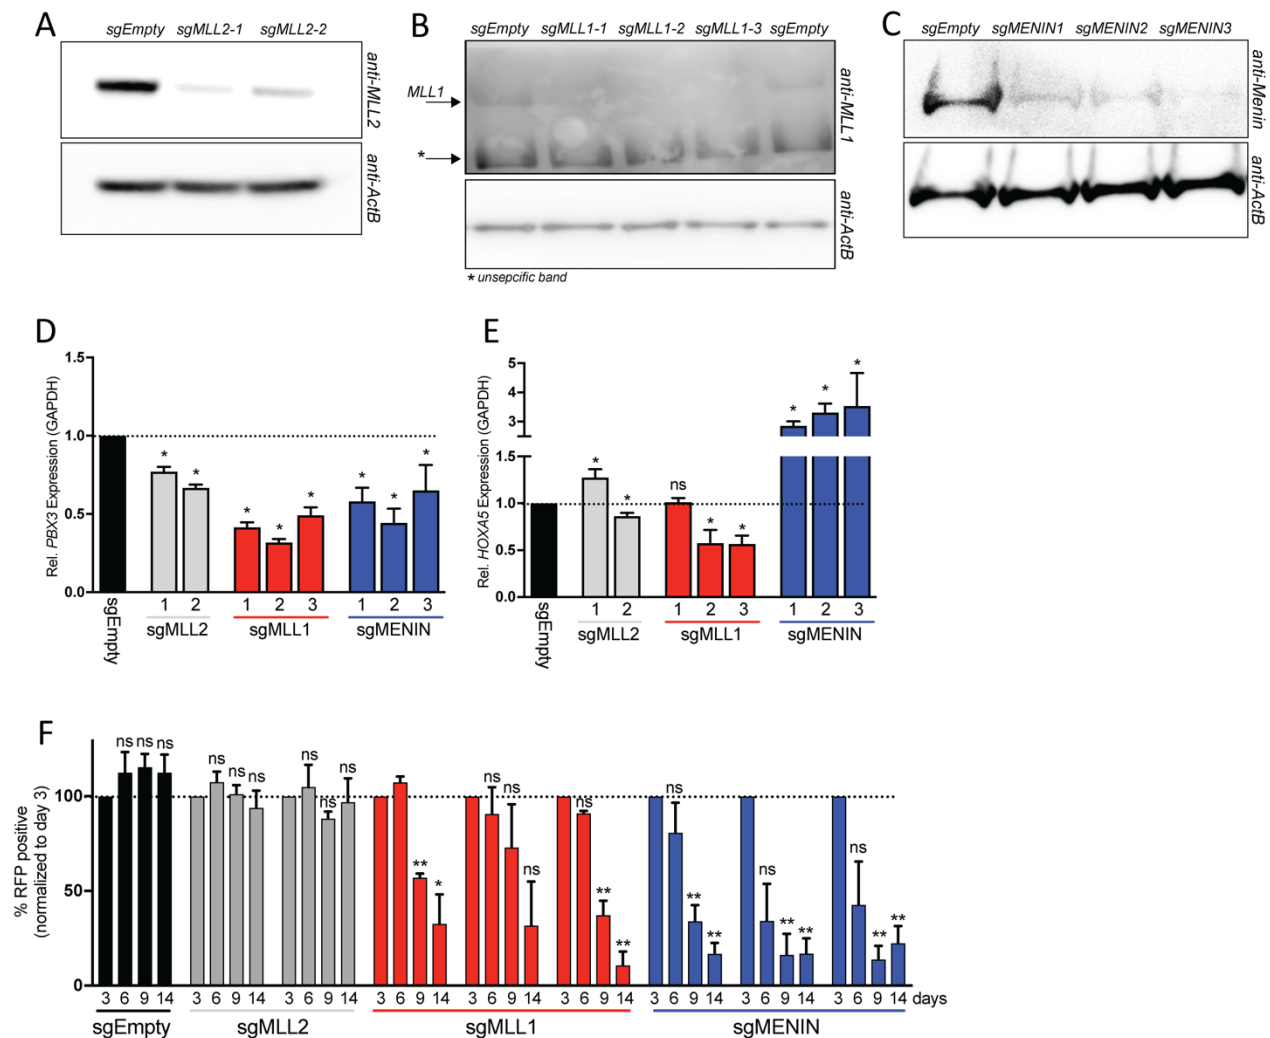

**Fig. S8. Knock-out of *MLL1*, but not *MLL2* leads to reduction in *HOXA/B* expression as well as *MEIS1* and *PBX3* in OCI-AML3 cells.**

(A) Immunoblot validation of CRISPR Cas9 mediated knock-out of *MLL2*, (B) *MLL1*, and (C) *Menin* in OCI-AML3 cells day 5 post transduction with sgRNA lentivirus using three independent sgRNAs. (D) Gene expression analysis of *PBX3* and (E) *HOXA5*, 5 days after sg*MLL1*, sg*MLL2*, and sg*Menin* transduction assessed by qRT-PCR. Mean of three independent experiments. (F) Negative selection competition assay plotting %RFP<sup>+</sup> (sgRNA<sup>+</sup>) cells at indicated time-points after lentiviral transduction normalized to %RFP<sup>+</sup> cells on day 3. Mean of three independent experiments ± SEM. \* P < 0.05, \*\* P < 0.01.

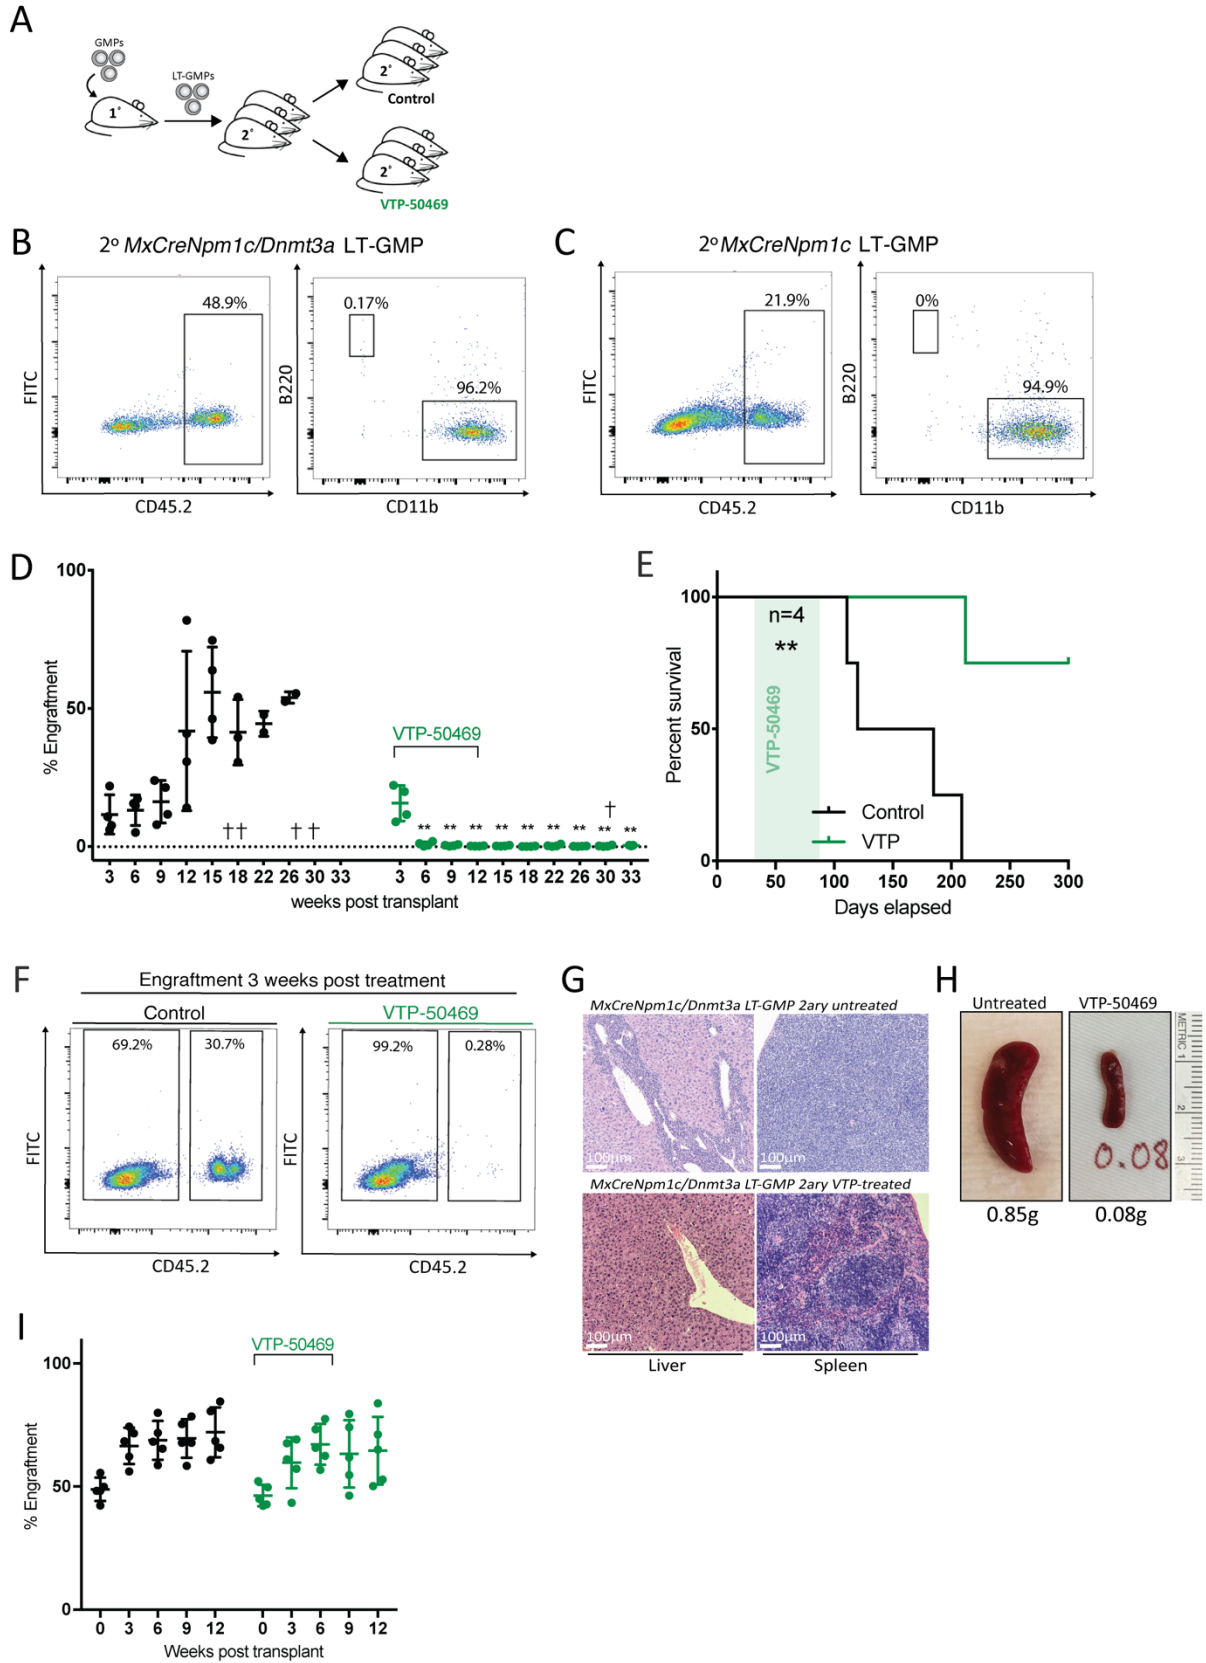

**Fig. S9. Pre-leukemic LT-GMPs are highly sensitive to Menin-MLL inhibition and can be eradicated by *in vivo* VTP-50469 treatment.**

(A) Experimental overview: Mice were transplanted with long-term engrafted GMPs (LT-GMPs), secondary engraftment was confirmed after 3 weeks, and mice were separated into control and 0.1% VTP-50469 chow treatment groups. (B) Representative FACS plots confirming secondary *MxCreNpm<sup>I<sup>lox-cA/+</sup>Dnmt3a<sup>R878H/+</sup></sup>* double and (C) *MxCreNpm<sup>I<sup>lox-cA/+</sup></sup>* single mutant LT-GMP engraftment 3 weeks after transplant. (D) Percent peripheral blood CD45.2 engraftment of *MxCreNpm<sup>I<sup>lox-cA/+</sup></sup>* LT-GMP 2<sup>ary</sup> transplants treated with control or 0.1% VTP-50469 spiked chow for 9 weeks (n=4 mice per group). (E) Kaplan-Meier survival analysis showing significantly increased survival of *MxCreNpm<sup>I<sup>lox-cA/+</sup></sup>* LT-GMP secondary recipient mice dosed with VTP-50469. (F) Representative FACS plot comparing CD45.2 engraftment of LT-GMP 2<sup>ary</sup> recipients after 3 weeks of control or VTP-50469 treatment. (G) Histological analysis of liver and spleen of *MxCreNpm<sup>I<sup>lox-cA/+</sup>Dnmt3a<sup>R878H/+</sup></sup>* LT-GMP secondary recipient mice treated with control or VTP-50469 spiked chow (9 weeks). (H) Representative spleen image of an untreated versus a VTP-50469 treated *MxCreNpm<sup>I<sup>lox-cA/+</sup>Dnmt3a<sup>R878H/+</sup></sup>* LT-GMP secondary recipient. (I) Percent peripheral blood CD45.2 engraftment of secondary transplants of FACS sorted WT HSCs (LSKCD150<sup>+</sup>CD48<sup>-</sup>; n=5 mice per group).

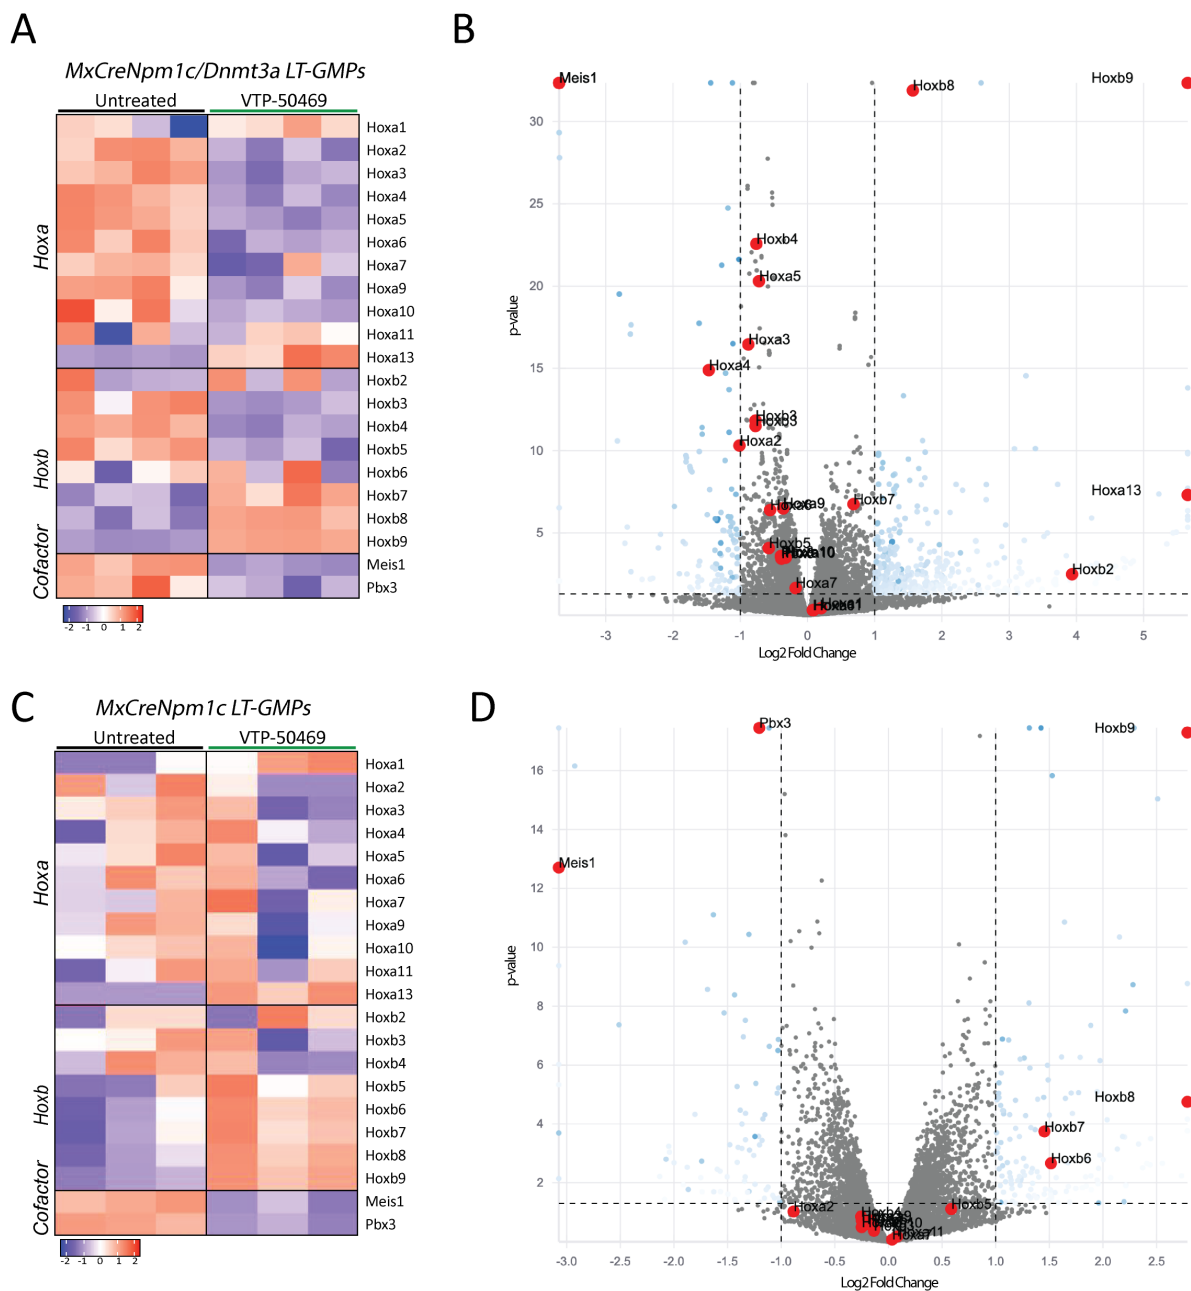

**Fig. S10. *In vivo* VTP-50469 treated mouse LT-GMPs strongly repress *Meis1* and *Pbx3* expression with varying effects on *Hoxa/b* expression.**

(A) Heatmap of RNAseq gene expression (z-scores of normalized counts) of *HoxA/B* cluster genes and co-factors *Meis1* and *Pbx3* of *MxCreNpm1<sup>fllox-cA/+</sup>Dnmt3a<sup>R878H/+</sup>* LT-GMPs treated with VTP-50469 *in vivo* for 5 days. (B) Scatter plot of Log2 fold changes in gene expression of *MxCreNpm1<sup>fllox-cA/+</sup>Dnmt3a<sup>R878H/+</sup>* LT-GMPs treated with VTP-50469 *in vivo* for 5 days. (n=4 mice) (C) Heatmap of RNAseq gene expression (z-scores of normalized counts) of *HoxA/B* cluster genes and co-factors *Meis1* and *Pbx3* of *MxCreNpm1<sup>fllox-cA/+</sup>* LT-GMPs treated with VTP-50469 *in vivo* for 5 days. (n=4 mice)

vivo for 5 days. (D) Scatter plot of Log2 fold changes in gene expression of *MxCreNpm1<sup>flax-cA/+</sup>* LT-GMPs treated with VTP-50469 in vivo for 5 days. (n=3 mice).

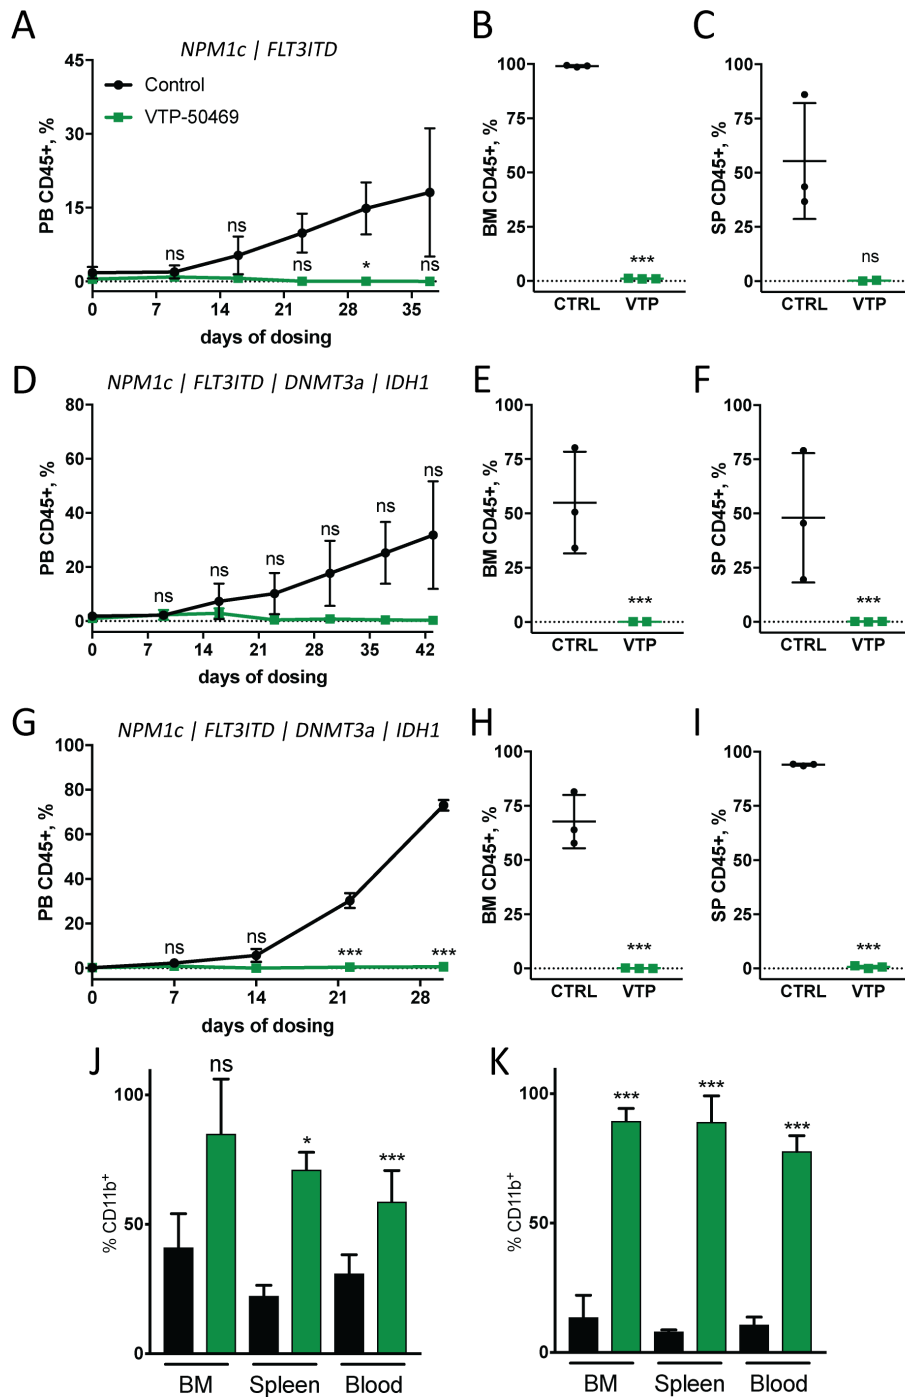

**Fig. S11. VTP-50469 suppresses growth and induces differentiation in human *NPM1c* mutant AML cells in PDX models.**

(A) Percent human CD45 (hCD45) engraftment of *NPM1c/FLT3ITD* mutant AML cells (Patient #2, table S4) in peripheral blood of NOG mice over time and in (B) bone marrow and (C) spleen

at end point (day 37 of treatment, n=3 mice per group). (D) Percent hCD45 engraftment of *NPM1c/FLT3ITD/DNMT3A/IDH1* mutant AML cells (Patient #3, table S4) in peripheral blood of NOG mice over time and (E) bone marrow and (F) spleen at end point (day 43; n=3 mice per group). (G) Percent hCD45 engraftment of *NPM1c/FLT3ITD/DNMT3A/IDH1* mutant AML cells (Patient #4, table S4) in peripheral blood of NOG mice over time and (H) bone marrow and (I) spleen at end point (day 30, n=3). (J) Summary of BM, spleen and peripheral blood %CD11b<sup>+</sup> expression on hCD45<sup>+</sup> cells after *in vivo* VTP treatment of PDX sample #3 and (K) PDX sample #4 at endpoint (n=3 mice per group). Student's t-test. \* $P < 0.05$ , \*\* $P < 0.01$ , \*\*  $P < 0.01$ , \*\*\*  $P < 0.001$ .

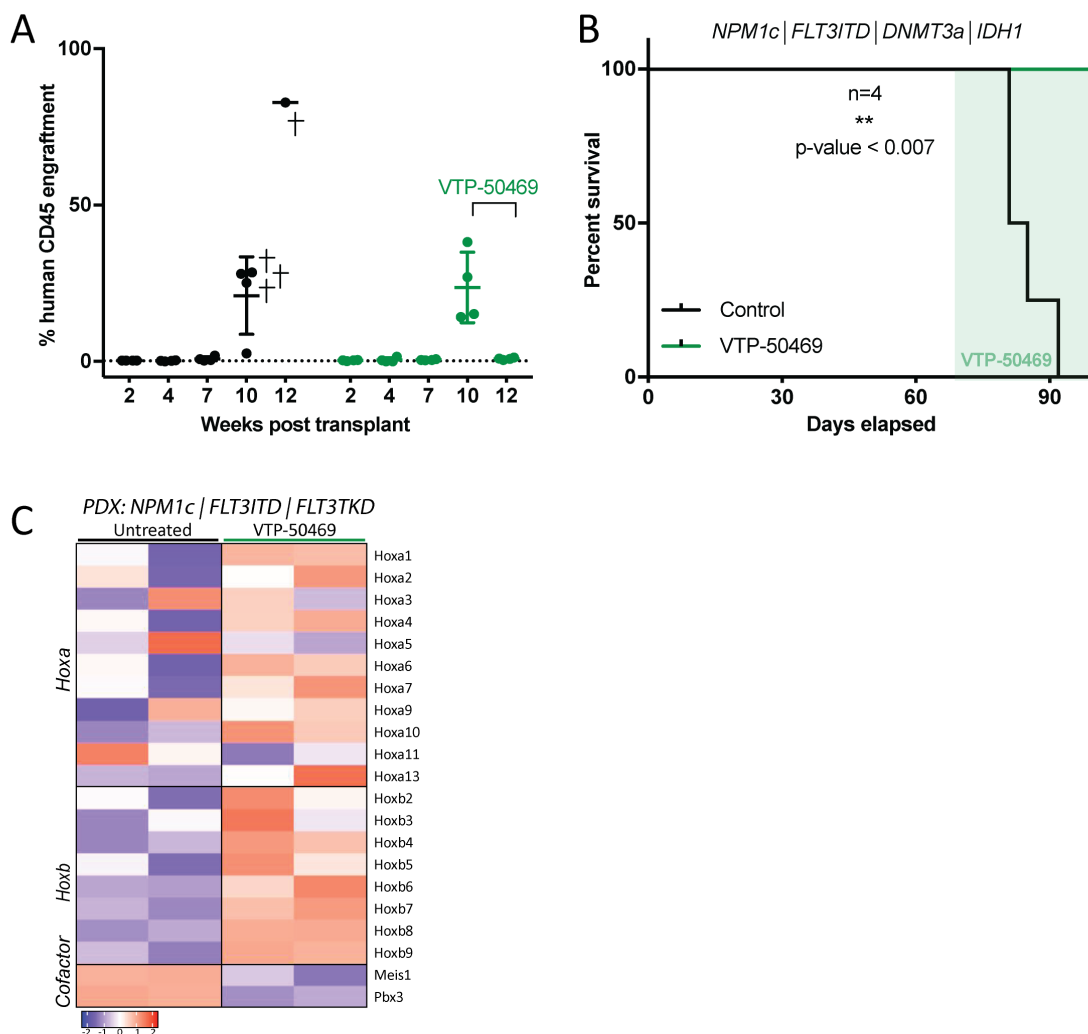

**Fig. S12. VTP-50469 treatment of *NPM1c* mutated human PDX models shows rapid reduction of peripheral blood engraftment and enhanced survival.**

(A) Human CD45 engraftment (%) in peripheral of control or VTP-50469 treated patient derived *NPM1c/FLT3ITD/DNMT3a/IDH1* mutant AML cells (Patient sample # 4, see table S5) in NOG mice (n=4 mice per group). (B) Kaplan-Meier survival curve of *NPM1c/FLT3ITD/DNMT3A/IDH1* mutant AML PDX model (Patient # 4) receiving control or VTP-50469 spiked chow starting on day 70 post-transplant. (C) Summary of RNAseq gene expression analysis (z-scores of normalized counts) of *HOXA/B* cluster and co-factors *MEIS1* and *PBX3* in duplicate PDX samples harvested 10 days post VTP-50469 treatment *in vivo* (Patient #1, table S5).



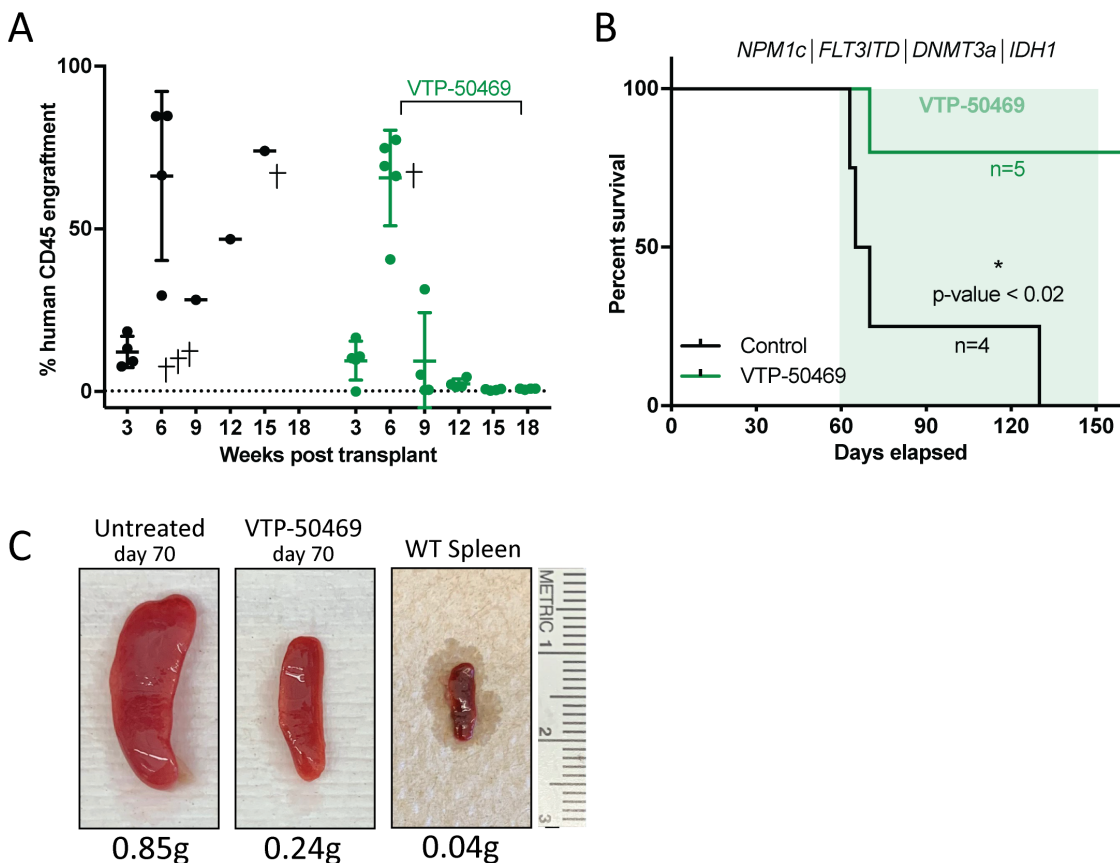

**Fig. S13. VTP-50469 effectively eradicates highly engrafted human *NPM1c*<sup>+</sup> AML cells in PDX mice.**

(A) Human CD45 engraftment (%) in peripheral of control or VTP-50469 treated patient derived *NPM1c/FLT3ITD/DNMT3A/IDH1* mutant AML cells (Patient sample # 4, table S5) in NOG mice (n=4 control and n=5 VTP-50469 treated mice per group). (B) Kaplan-Meier survival curve of highly engrafted (average >50% hCD45) *NPM1c/FLT3ITD/DNMT3A/IDH1* mutant AML PDX model receiving control or VTP-50469 spiked chow for 90 days. (C) Spleen images of WT NOG control and moribund *NPM1c/FLT3ITD/DNMT3A/IDH1* mutant AML PDX mice sacrificed on day 70 post-transplant showing reduced spleen size in VTP-50469 treated mouse 10 days post treatment.
