# Supplementary material
Source: PubMed Central journal article supplement (PMC7754791)
Supplement: NIHMS1624568-supplement-Table_Captions.pdf [file NIHMS1624568-supplement-Table_Captions.pdf]

**Table S1. Summary of RNAseq gene expression analyses of mouse and human cells.**

RNAseq analysis of differential gene expression of: *MxCreNpm1c<sup>flox-cA/+</sup>* versus WT GMPs and LSKs, 4 weeks post pIpC injection; Mouse *MIG-CreNPM1c/DNMT3a* mutant leukemic GMPs compared to WT GMPs; OCI-AML3 cells treated with DMSO versus 330 nM VTP-50469 for 3, 5, and 7 days; *Npm1<sup>flox-cA/+</sup>Dnmt3a<sup>R878H/+</sup>* mouse cell line (SIIL12) treated with DMSO versus 30 nM VTP-50469 for 3 days; Mouse *MxCreNpm1<sup>flox-cA/+</sup>Dnmt3a<sup>R878H/+</sup>* LT-GMPs treated with control versus 0.1% VTP-50469 spiked chow *in vivo* for 5 days.

**Table S2. Summary of Menin and MLL1 ChIPseq analyses in OCI-AML3 cells.**

Differential occupancy at TSSs of MLL1 and Menin in DMSO versus 330 nM VTP-50469 (4 days) treated OCI-AML3 cells.

**Table S3. Lists of gene signatures used for GSEA analyses.**

List of all gene sets used in this study including custom made gene sets “OCI-AML3\_VTP-50469\_MLL\_LOSS” (top 200 genes that lose MLL TSS occupancy in response to VTP-50469 treatment determined by ChIPseq analysis) and “UP\_IN\_LSK\_VS\_GMP” (genes significantly upregulated in wildtype LSKs versus GMPs determined by RNAseq analysis).

**Table S4. Summary of sequencing results to verify MLL1, MLL2 Meis1 editing.**

CLUSTAL O(1.2.0) multiple sequence alignment of amplicons of targeted genomic DNA for *sgMLL1*, *sgMLL2*, and mouse *sgMeis1*.

**Table S5. Patient derived xenograft sample information.**

Summary of age, gender, and therapy information available for patient samples used in PDX studies.

**Table S6. Detailed patient information for matched NPM1c<sup>+</sup> MDS and sAML samples.**

Summary of age, type, and time to relapse information for matched NPM1c<sup>+</sup> MDS and sAML samples.
